# Supplementary material for: Cleaning up our water: reducing interferences from nonhomogeneous freezing of “pure” water in droplet freezing assays of ice-nucleating particles
Source: Copernicus journal article supplement (doi:10.5194/amt-11-5315-2018), 2018-09-24
Supplement: Supplementary file 1 [file amt-11-5315-2018-supplement.zip]

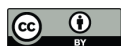

## *Supplement of*

# **Cleaning up our water: reducing interferences from nonhomogeneous freezing of “pure” water in droplet freezing assays of ice-nucleating particles**

**Michael Polen et al.**

*Correspondence to:* Ryan C. Sullivan (rsullivan@cmu.edu)

- amt-11-5315-2018-supplement-title-page.pdf
- AMTData
  - Fig10\_Microfluidic\_FF\_INP.txt
  - Fig11.txt
  - Fig1\_Avg.txt
  - Fig1and6\_Combine.txt
  - Fig3\_MilliQ\_FF\_INP.txt
  - Fig3and5\_NewFilter\_FF\_INP.txt
  - Fig3and5\_OldFilter\_FF\_INP.txt
  - Fig4\_0615to0620.txt
  - Fig4\_0621to0627.txt
  - Fig4\_0628to0629.txt
  - Fig4\_0705.txt
  - Fig5\_LargeWithExp\_FF\_INP.txt
  - Fig5\_Large\_FF\_INP.txt
  - Fig7\_VasNoOil\_HPLC\_FF\_INP.txt
  - Fig7\_VasNoOil\_MilliQ\_FF\_INP.txt
  - Fig7\_VasOil\_HPLC\_FF\_INP.txt
  - Fig8\_GoldCS\_Large\_FF\_INP.txt
  - Fig8\_GoldCS\_MilliQ\_FF\_INP.txt
  - Fig8\_GoldWafer\_FF\_INP.txt
  - Fig8\_NewWafer\_FF\_INP.txt
  - Fig9\_PDMSTreated\_FF\_INP.txt
  - Fig9\_PDMSUntreated\_FF\_INP.txt
  - Pf\_theoreticalvalues.txt

The copyright of individual parts of the supplement might differ from the CC BY 4.0 License.
