# Supplementary material for: Cleaning up our water: reducing interferences from nonhomogeneous freezing of “pure” water in droplet freezing assays of ice-nucleating particles
Source: Copernicus journal article supplement (doi:10.5194/amt-11-5315-2018), 2018-09-24
Supplement: Supplementary file 2 [file amt-11-5315-2018-supplement.zip]

Archive with 25 entries (24 files):
- AMTData/
- AMTData/Fig1_Avg.txt
- AMTData/Fig9_PDMSTreated_FF_INP.txt
- AMTData/Fig4_0628to0629.txt
- AMTData/Fig1and6_Combine.txt
- AMTData/Fig10_Microfluidic_FF_INP.txt
- AMTData/Fig4_0615to0620.txt
- AMTData/Fig3_MilliQ_FF_INP.txt
- AMTData/Fig5_LargeWithExp_FF_INP.txt
- AMTData/Fig8_GoldWafer_FF_INP.txt
- AMTData/Fig4_0621to0627.txt
- AMTData/Fig11.txt
- AMTData/Fig9_PDMSUntreated_FF_INP.txt
- AMTData/Fig8_GoldCS_MilliQ_FF_INP.txt
- AMTData/Pf_theoreticalvalues.txt
- AMTData/Fig7_VasNoOil_MilliQ_FF_INP.txt
- AMTData/Fig4_0705.txt
- AMTData/Fig7_VasOil_HPLC_FF_INP.txt
- AMTData/Fig5_Large_FF_INP.txt
- AMTData/Fig3and5_NewFilter_FF_INP.txt
- AMTData/Fig8_GoldCS_Large_FF_INP.txt
- AMTData/Fig8_NewWafer_FF_INP.txt
- AMTData/Fig7_VasNoOil_HPLC_FF_INP.txt
- AMTData/Fig3and5_OldFilter_FF_INP.txt
- amt-11-5315-2018-supplement-title-page.pdf
