# Supplementary material for: Cleaning up our water: reducing interferences from nonhomogeneous freezing of “pure” water in droplet freezing assays of ice-nucleating particles
Source: Copernicus journal article supplement (doi:10.5194/amt-11-5315-2018), 2018-09-24
Supplement: Supplementary file 2 [file amt-11-5315-2018-supplement.zip › AMTData/Fig1_Avg.txt]

Temp	INPavg	INPsdev
-0	0	0
-0.5	0	0
-1	0	0
-1.5	0	0
-2	0	0
-2.5	0	0
-3	0	0
-3.5	0	0
-4	0	0
-4.5	0	0
-5	0	0
-5.5	0	0
-6	0	0
-6.5	0	0
-7	0	0
-7.5	0	0
-8	0	0
-8.5	0	0
-9	0	0
-9.5	0	0
-10	0	0
-10.5	0	0
-11	0	0
-11.5	0	0
-12	0	0
-12.5	0	0
-13	0	0
-13.5	0	0
-14	0	0
-14.5	0	0
-15	0	0
-15.5	0	0
-16	0	0
-16.5	0	0
-17	0	0
-17.5	0	0
-18	0	0
-18.5	0	0
-19	0	0
-19.5	0	0
-20	0	0
-20.5	0	0
-21	0	0
-21.5	0.016751364	0.041002065
-22	0.029481698	0.056345027
-22.5	0.034546621	0.066169783
-23	0.06512367	0.094833985
-23.5	0.077482283	0.11534501
-24	0.086602286	0.12702279
-24.5	0.11531834	0.13360928
-25	0.18470179	0.12507448
-25.5	0.25087142	0.12793125
-26	0.35129926	0.13865693
-26.5	0.44074422	0.17599268
-27	0.53119898	0.1901466
-27.5	0.61714727	0.20515859
-28	0.66214383	0.21777454
-28.5	0.71827871	0.21098371
-29	0.75316054	0.21331351
-29.5	0.78471673	0.20885691
-30	0.81843162	0.18197536
-30.5	0.86170846	0.14839792
-31	0.91488922	0.098658234
-31.5	0.94607729	0.066022389
-32	0.967664	0.054619331
-32.5	0.97563648	0.04796819
-33	0.97983778	0.042129196
-33.5	0.98377353	0.036322244
-34	0.98703402	0.030369438
-34.5	0.99023581	0.024554519
-35	0.99722189	0.0059830109
-35.5	1	0
-36	1	0
-36.5	1	0
-37	1	0
-37.5	1	0
-38	1	0
-38.5	1	0
-39	1	0
-39.5	1	0
-40	1	0
