# Supplementary material for: Cleaning up our water: reducing interferences from nonhomogeneous freezing of “pure” water in droplet freezing assays of ice-nucleating particles
Source: Copernicus journal article supplement (doi:10.5194/amt-11-5315-2018), 2018-09-24
Supplement: Supplementary file 2 [file amt-11-5315-2018-supplement.zip › AMTData/Fig1and6_Combine.txt]

CombineFF	CombineTemp
0	-0
0	-0.5
0	-1
0	-1.5
0	-2
0	-2.5
0	-3
0	-3.5
0	-4
0	-4.5
0	-5
0	-5.5
0	-6
0	-6.5
0	-7
0	-7.5
0	-8
0	-8.5
0	-9
0	-9.5
0	-10
0	-10.5
0	-11
0	-11.5
0	-12
0	-12.5
0	-13
0	-13.5
0	-14
0	-14.5
0	-15
0	-15.5
0	-16
0	-16.5
0	-17
0	-17.5
0	-18
0	-18.5
0	-19
0	-19.5
0	-20
0	-20.5
0	-21
0.016666668	-21.5
0.025	-22
0.025	-22.5
0.058333334	-23
0.06666667	-23.5
0.075000003	-24
0.10833333	-24.5
0.15833333	-25
0.20833333	-25.5
0.30833334	-26
0.375	-26.5
0.49166667	-27
0.55000001	-27.5
0.60000002	-28
0.64999998	-28.5
0.64999998	-29
0.70833331	-29.5
0.74166667	-30
0.80000001	-30.5
0.85000002	-31
0.89999998	-31.5
0.94166666	-32
0.94999999	-32.5
0.95833331	-33
0.95833331	-33.5
0.96666664	-34
0.96666664	-34.5
0.97500002	-35
1	-35.5
1	-36
1	-36.5
1	-37
1	-37.5
1	-38
1	-38.5
1	-39
1	-39.5
1	-40
