# Supplementary material for: Cleaning up our water: reducing interferences from nonhomogeneous freezing of “pure” water in droplet freezing assays of ice-nucleating particles
Source: Copernicus journal article supplement (doi:10.5194/amt-11-5315-2018), 2018-09-24
Supplement: Supplementary file 2 [file amt-11-5315-2018-supplement.zip › AMTData/Fig3and5_NewFilter_FF_INP.txt]

Temp	INPavg	INPsdev	Temp	INPavg	INPsdev
-0	0	0	-0	0	0
-0.5	0	0	-0.5	0	0
-1	0	0	-1	0	0
-1.5	0	0	-1.5	0	0
-2	0	0	-2	0	0
-2.5	0	0	-2.5	0	0
-3	0	0	-3	0	0
-3.5	0	0	-3.5	0	0
-4	0	0	-4	0	0
-4.5	0	0	-4.5	0	0
-5	0	0	-5	0	0
-5.5	0	0	-5.5	0	0
-6	0	0	-6	0	0
-6.5	0	0	-6.5	0	0
-7	0	0	-7	0	0
-7.5	0	0	-7.5	0	0
-8	0	0	-8	0	0
-8.5	0	0	-8.5	0	0
-9	0	0	-9	0	0
-9.5	0	0	-9.5	0	0
-10	0	0	-10	0	0
-10.5	0	0	-10.5	0	0
-11	0	0	-11	0	0
-11.5	0	0	-11.5	0	0
-12	0	0	-12	0	0
-12.5	0	0	-12.5	0	0
-13	0	0	-13	0	0
-13.5	0	0	-13.5	0	0
-14	0	0	-14	0	0
-14.5	0	0	-14.5	0	0
-15	0	0	-15	0	0
-15.5	0	0	-15.5	0	0
-16	0	0	-16	0	0
-16.5	0	0	-16.5	0	0
-17	0	0	-17	0	0
-17.5	0	0	-17.5	0	0
-18	0	0	-18	0	0
-18.5	0	0	-18.5	0	0
-19	0	0	-19	0	0
-19.5	0	0	-19.5	0.0011026751	0.0039757518
-20	19.609495	45.820705	-20	0.0034229218	0.0066080587
-20.5	19.609495	45.820705	-20.5	0.004320242	0.0082844123
-21	41.33979	72.380203	-21	0.007291818	0.010268332
-21.5	80.758362	118.5581	-21.5	0.012915395	0.017518913
-22	171.75705	307.29465	-22	0.028504379	0.045967571
-22.5	253.94823	437.81152	-22.5	0.036960401	0.060194906
-23	292.67578	476.77515	-23	0.043442771	0.066435702
-23.5	401.56274	609.24005	-23.5	0.055307183	0.081627972
-24	526.74792	980.54388	-24	0.070797302	0.11483838
-24.5	790.98303	1354.1725	-24.5	0.093890958	0.14336701
-25	1025.1506	1581.8448	-25	0.11897862	0.15631917
-25.5	1303.4266	1921.0275	-25.5	0.14803825	0.17658116
-26	1624.3065	2425.9954	-26	0.17158839	0.194254
-26.5	2563.3555	3583.0056	-26.5	0.23711257	0.22481534
-27	3418.7268	4906.7515	-27	0.28465182	0.24575534
-27.5	4426.2646	6399.8462	-27.5	0.32743421	0.2461309
-28	5468.6445	7480.8105	-28	0.38727766	0.24453214
-28.5	6433.3906	7419.8936	-28.5	0.45520845	0.24347451
-29	7721.5479	7194.5864	-29	0.53359532	0.2216185
-29.5	7920.2231	4453.7202	-29.5	0.6300261	0.1957466
-30	10113.196	5109.0371	-30	0.71891642	0.16668147
-30.5	12719.616	6028.4478	-30.5	0.79315841	0.14363571
-31	15603.941	6967.1953	-31	0.84045321	0.12573422
-31.5	18857.371	8176.1079	-31.5	0.88145936	0.11143826
-32	20695.02	6620.9473	-32	0.92380393	0.075963862
-32.5	22545.109	6204.9331	-32.5	0.95073038	0.049375545
-33	29355.5	11162.654	-33	0.98194808	0.024826033
-33.5			-33.5	1	0
-34			-34	1	0
-34.5			-34.5	1	0
-35			-35	1	0
-35.5			-35.5	1	0
-36			-36	1	0
-36.5			-36.5	1	0
-37			-37	1	0
-37.5			-37.5	1	0
-38			-38	1	0
-38.5			-38.5	1	0
-39			-39	1	0
-39.5			-39.5	1	0
-40			-40	1	0
