# Supplementary material for: Cleaning up our water: reducing interferences from nonhomogeneous freezing of “pure” water in droplet freezing assays of ice-nucleating particles
Source: Copernicus journal article supplement (doi:10.5194/amt-11-5315-2018), 2018-09-24
Supplement: Supplementary file 2 [file amt-11-5315-2018-supplement.zip › AMTData/Fig4_0615to0620.txt]

Frozen_Fraction	Tactual	Frozen_Fraction	Tactual	Frozen_Fraction	Tactual	Frozen_Fraction	Tactual	Frozen_Fraction	Tactual	Frozen_Fraction	Tactual	Frozen_Fraction	Tactual
0.03846153846153846	-20.68345	0.09375	-18.94645	0.02564102564102564	-17.5472	0.02380952380952381	-15.5979	0.02631578947368421	-17.7402	0.04444444444444445	-21.7739	0.01754385964912281	-15.06715
0.07692307692307693	-21.66775	0.15625	-19.50615	0.05128205128205128	-17.6437	0.04761904761904762	-20.558	0.05263157894736842	-20.37465	0.06666666666666667	-23.1635	0.03508771929824561	-15.37595
0.1153846153846154	-21.74495	0.1875	-19.6895	0.07692307692307693	-20.7317	0.07142857142857142	-21.57125	0.07894736842105263	-22.20815	0.08888888888888889	-23.7425	0.05263157894736842	-16.64975
0.1538461538461539	-22.05375	0.21875	-19.89215	0.1025641025641026	-22.11165	0.09523809523809523	-22.42045	0.1052631578947368	-22.61345	0.1111111111111111	-23.839	0.07017543859649122	-19.1877
0.2307692307692308	-22.7582	0.25	-19.98865	0.1282051282051282	-22.88365	0.119047619047619	-22.6424	0.131578947368421	-23.09595	0.1333333333333333	-24.1092	0.08771929824561403	-19.979
0.2692307692307692	-22.9319	0.3125	-21.37825	0.1538461538461539	-23.36615	0.1428571428571428	-23.7039	0.1578947368421053	-23.55915	0.1555555555555556	-24.3794	0.1052631578947368	-21.45545
0.3846153846153846	-23.646	0.34375	-21.64845	0.1794871794871795	-24.418	0.1666666666666667	-23.8969	0.1842105263157895	-24.08025	0.2	-24.7847	0.1228070175438596	-21.9669
0.4230769230769231	-23.7425	0.375	-21.74495	0.2051282051282051	-24.5145	0.1904761904761905	-24.0127	0.2105263157894737	-24.23465	0.2222222222222222	-25.2865	0.1403508771929824	-22.4494
0.4615384615384616	-24.1092	0.40625	-21.86075	0.2307692307692308	-24.62065	0.2380952380952381	-24.27325	0.2368421052631579	-24.42765	0.2444444444444444	-25.48915	0.1578947368421053	-23.1635
0.5384615384615384	-24.27325	0.46875	-22.05375	0.282051282051282	-24.91015	0.2619047619047619	-24.35045	0.2631578947368421	-24.5145	0.2666666666666667	-25.58565	0.1929824561403509	-23.26
0.5769230769230769	-24.4759	0.5	-22.15025	0.3076923076923077	-25.21895	0.3095238095238095	-24.44695	0.2894736842105263	-24.81365	0.2888888888888889	-26.16465	0.2456140350877193	-23.5302
0.6538461538461539	-24.56275	0.53125	-22.2564	0.3333333333333333	-25.70145	0.3333333333333333	-24.54345	0.3157894736842105	-25.21895	0.3111111111111111	-26.66645	0.2631578947368421	-23.646
0.6923076923076923	-24.6882	0.5625	-22.5652	0.358974358974359	-25.79795	0.3571428571428572	-24.73645	0.3421052631578947	-25.41195	0.3333333333333333	-27.14895	0.2982456140350877	-23.839
0.7692307692307693	-25.1514	0.59375	-22.8354	0.3846153846153846	-26.10675	0.3809523809523809	-24.85225	0.3684210526315789	-25.79795	0.3555555555555556	-27.34195	0.3333333333333333	-24.04165
0.8846153846153846	-25.2479	0.625	-22.9319	0.4102564102564102	-26.20325	0.4523809523809524	-25.04525	0.3947368421052632	-25.89445	0.3777777777777778	-27.55425	0.3859649122807017	-24.13815
0.9230769230769231	-26.1357	0.65625	-23.3372	0.4358974358974359	-26.28045	0.4761904761904762	-25.33475	0.4473684210526316	-26.29975	0.4	-27.9499	0.4035087719298245	-24.3022
0.9615384615384616	-27.0235	0.6875	-23.8197	0.4615384615384616	-26.37695	0.5	-25.43125	0.4736842105263158	-26.97525	0.4666666666666667	-28.1622	0.4210526315789473	-24.3987
1	-27.12	0.71875	-23.9162	0.4871794871794872	-26.56995	0.5238095238095238	-25.52775	0.5263157894736842	-27.0814	0.4888888888888889	-28.6254	0.456140350877193	-24.5145
		0.78125	-24.032	0.5128205128205128	-26.87875	0.5714285714285714	-26.01025	0.5526315789473685	-27.2744	0.5111111111111111	-28.857	0.5087719298245614	-24.71715
		0.8125	-24.1285	0.5641025641025641	-27.1779	0.6190476190476191	-26.10675	0.5789473684210527	-27.36125	0.5333333333333333	-29.0307	0.543859649122807	-24.9005
		0.84375	-24.225	0.5897435897435898	-27.6604	0.6428571428571429	-26.5989	0.6052631578947368	-28.3359	0.5555555555555556	-29.1272	0.5789473684210527	-24.997
		0.875	-24.46625	0.6153846153846154	-27.8534	0.6666666666666666	-26.6954	0.631578947368421	-28.71225	0.5777777777777777	-29.83165	0.631578947368421	-25.50845
		0.90625	-25.383	0.6410256410256411	-28.03675	0.6904761904761905	-26.78225	0.6578947368421053	-29.1079	0.6	-29.92815	0.6491228070175439	-25.60495
		0.9375	-25.9427	0.6666666666666666	-28.2394	0.7142857142857143	-27.5832	0.6842105263157895	-29.38775	0.6222222222222222	-30.02465	0.6842105263157895	-25.70145
		0.96875	-27.61215	0.6923076923076923	-29.2237	0.7380952380952381	-27.6604	0.7368421052631579	-29.6869	0.6444444444444445	-30.31415	0.7017543859649122	-25.89445
		1	-30.0922	0.717948717948718	-29.4167	0.7619047619047619	-27.7569	0.7631578947368421	-30.7677	0.6666666666666666	-30.62295	0.7192982456140351	-26.06815
				0.7435897435897436	-29.9957	0.7857142857142857	-27.8534	0.7894736842105263	-31.4625	0.7111111111111111	-30.71945	0.7368421052631579	-26.68575
				0.7692307692307693	-30.0922	0.8333333333333334	-28.3745	0.8157894736842105	-31.9257	0.7333333333333333	-30.81595	0.7543859649122807	-26.87875
				0.7948717948717948	-30.401	0.8571428571428571	-28.9342	0.8421052631578947	-32.72665	0.7555555555555555	-31.31775	0.7719298245614035	-26.97525
				0.8205128205128205	-30.98	0.8809523809523809	-29.0307	0.868421052631579	-33.03545	0.7777777777777778	-31.41425	0.8070175438596491	-27.26475
				0.8461538461538461	-31.27915	0.9047619047619048	-29.54215	0.8947368421052632	-33.30565	0.8	-32.2924	0.8245614035087719	-27.45775
				0.8717948717948718	-31.47215	0.9285714285714286	-29.629	0.9210526315789473	-33.51795000000001	0.8444444444444444	-32.3889	0.8421052631578947	-27.55425
				0.8974358974358975	-31.6555	0.9523809523809523	-30.21765	0.9473684210526315	-34.46365	0.8666666666666667	-32.5047	0.8771929824561403	-27.65075
				0.9487179487179487	-32.05115	0.9761904761904762	-30.31415	1	-34.56015	0.8888888888888888	-32.6977	0.8947368421052632	-27.9499
				0.9743589743589743	-32.63015	1	-33.3732			0.9333333333333333	-33.3732	0.9122807017543859	-28.13325
				1	-33.03545					0.9777777777777777	-33.7785	0.9298245614035088	-28.5289
										1	-34.11625	0.9473684210526315	-28.6254
												0.9649122807017544	-29.0114
												0.9824561403508771	-29.3202
												1	-30.0922
