# Supplementary material for: Cleaning up our water: reducing interferences from nonhomogeneous freezing of “pure” water in droplet freezing assays of ice-nucleating particles
Source: Copernicus journal article supplement (doi:10.5194/amt-11-5315-2018), 2018-09-24
Supplement: Supplementary file 2 [file amt-11-5315-2018-supplement.zip › AMTData/Fig4_0621to0627.txt]

Frozen_Fraction	Tactual	Frozen_Fraction	Tactual	Frozen_Fraction	Tactual	Frozen_Fraction	Tactual	Frozen_Fraction	Tactual	Frozen_Fraction	Tactual	Frozen_Fraction	Tactual	Frozen_Fraction	Tactual	Frozen_Fraction	Tactual
0.02083333333333333	-12.21075	0.02127659574468085	-18.7052	0.02439024390243903	-16.91995	0.02127659574468085	-14.87415	0.02127659574468085	-16.74625	0.02127659574468085	-16.0997	0.02272727272727273	-14.4785	0.02631578947368421	-17.7595	0.02272727272727273	-18.821
0.04166666666666666	-14.98995	0.0425531914893617	-19.4	0.04878048780487805	-20.6159	0.0425531914893617	-17.9139	0.0425531914893617	-16.8717	0.0851063829787234	-21.55195	0.04545454545454546	-19.40965	0.05263157894736842	-17.86565	0.04545454545454546	-19.6702
0.0625	-19.8439	0.06382978723404255	-19.6509	0.07317073170731707	-21.1177	0.06382978723404255	-18.8017	0.06382978723404255	-17.856	0.1063829787234043	-21.82215	0.06818181818181818	-19.93075	0.07894736842105263	-19.02365	0.06818181818181818	-19.8632
0.08333333333333333	-21.909	0.0851063829787234	-20.7317	0.0975609756097561	-22.78715	0.0851063829787234	-21.0019	0.0851063829787234	-17.9525	0.1276595744680851	-21.95725	0.09090909090909091	-20.3264	0.1052631578947368	-20.172	0.09090909090909091	-20.172
0.1041666666666667	-22.11165	0.1063829787234043	-21.6195	0.1219512195121951	-23.07665	0.1063829787234043	-21.6195	0.1063829787234043	-18.0297	0.148936170212766	-22.53625	0.1136363636363636	-21.4844	0.131578947368421	-20.47115	0.1136363636363636	-20.85715
0.125	-22.59415	0.1276595744680851	-22.1985	0.1463414634146341	-23.86795	0.1276595744680851	-21.91865	0.148936170212766	-18.4929	0.1702127659574468	-23.01875	0.1363636363636364	-21.7739	0.1578947368421053	-21.45545	0.1363636363636364	-21.84145
0.1875	-22.69065	0.148936170212766	-22.874	0.1707317073170732	-24.3215	0.148936170212766	-22.102	0.1702127659574468	-18.92715	0.1914893617021277	-23.3179	0.1590909090909091	-21.86075	0.1842105263157895	-21.64845	0.1590909090909091	-22.34325
0.2083333333333333	-23.19245	0.1702127659574468	-22.99945	0.1951219512195122	-24.5145	0.1702127659574468	-22.1985	0.1914893617021277	-19.44825	0.2127659574468085	-23.8969	0.1818181818181818	-22.5652	0.2105263157894737	-21.72565	0.1818181818181818	-23.3179
0.2291666666666667	-23.40475	0.1914893617021277	-23.26965	0.2439024390243902	-24.611	0.1914893617021277	-22.681	0.2127659574468085	-20.2492	0.2340425531914894	-24.2057	0.2272727272727273	-23.0284	0.2368421052631579	-21.86075	0.2045454545454546	-23.4144
0.25	-23.57845	0.2340425531914894	-23.46265	0.2682926829268293	-24.7075	0.2127659574468085	-22.7775	0.2340425531914894	-21.137	0.2553191489361702	-24.27325	0.25	-23.453	0.2631578947368421	-22.03445	0.2272727272727273	-23.5302
0.2708333333333333	-23.79075	0.2553191489361702	-23.5495	0.2926829268292683	-24.91015	0.2340425531914894	-23.19245	0.2553191489361702	-21.2335	0.2765957446808511	-24.46625	0.2727272727272727	-23.5495	0.2894736842105263	-22.22745	0.25	-23.7232
0.3125	-24.25395	0.2765957446808511	-23.67495	0.3170731707317073	-25.00665	0.2553191489361702	-23.57845	0.2765957446808511	-21.6195	0.2978723404255319	-24.6689	0.2954545454545455	-23.8197	0.3157894736842105	-23.21175	0.2727272727272727	-24.0899
0.3333333333333333	-24.35045	0.2978723404255319	-23.98375	0.3414634146341464	-25.29615	0.2765957446808511	-23.75215	0.2978723404255319	-21.8125	0.3404255319148936	-24.7654	0.3181818181818182	-24.032	0.3421052631578947	-23.4144	0.3181818181818182	-24.1864
0.3541666666666667	-24.44695	0.3191489361702128	-24.15745	0.3658536585365854	-25.58565	0.2978723404255319	-24.42765	0.3191489361702128	-21.909	0.3617021276595745	-25.0742	0.3409090909090909	-24.1285	0.3684210526315789	-23.79075	0.3409090909090909	-24.27325
0.375	-24.56275	0.3404255319148936	-24.42765	0.3902439024390244	-25.68215	0.3191489361702128	-25.00665	0.3404255319148936	-22.102	0.3829787234042553	-25.2479	0.4090909090909091	-24.225	0.3947368421052632	-23.8969	0.3636363636363636	-24.46625
0.3958333333333333	-24.83295	0.3617021276595745	-24.52415	0.4146341463414634	-25.99095	0.3617021276595745	-25.19965	0.3617021276595745	-22.20815	0.4468085106382979	-25.383	0.4545454545454545	-24.36975	0.4210526315789473	-23.9934	0.3863636363636364	-24.6689
0.4583333333333333	-25.14175	0.3829787234042553	-24.62065	0.4390243902439024	-26.20325	0.4042553191489361	-25.50845	0.3829787234042553	-22.30465	0.5106382978723404	-25.5567	0.5454545454545454	-24.4952	0.4473684210526316	-24.2057	0.4090909090909091	-24.75575
0.4791666666666667	-25.4409	0.4042553191489361	-24.9005	0.4634146341463415	-26.28045	0.425531914893617	-25.62425	0.4042553191489361	-22.69065	0.5531914893617021	-25.8655	0.5681818181818182	-24.8812	0.4736842105263158	-24.27325	0.4318181818181818	-24.85225
0.5208333333333334	-25.7497	0.425531914893617	-25.00665	0.4878048780487805	-27.45775	0.4468085106382979	-25.79795	0.425531914893617	-22.98015	0.574468085106383	-26.06815	0.6136363636363636	-25.19	0.5526315789473685	-24.36975	0.4545454545454545	-24.94875
0.5416666666666666	-25.8462	0.4468085106382979	-25.10315	0.5121951219512195	-27.72795	0.4680851063829787	-25.89445	0.4468085106382979	-23.26	0.5957446808510638	-26.47345	0.6363636363636364	-25.2865	0.5789473684210527	-24.63995	0.4772727272727273	-25.04525
0.5833333333333334	-26.1164	0.4680851063829787	-25.19965	0.5609756097560976	-27.82445	0.4893617021276596	-26.56995	0.4893617021276596	-23.67495	0.6170212765957447	-27.05245	0.6590909090909091	-25.383	0.6052631578947368	-24.7654	0.5227272727272727	-25.2479
0.625	-27.61215	0.4893617021276596	-25.50845	0.5853658536585366	-27.92095	0.5106382978723404	-27.1779	0.5106382978723404	-23.77145	0.6595744680851063	-27.14895	0.6818181818181818	-25.6532	0.631578947368421	-24.85225	0.5681818181818182	-25.52775
0.6458333333333334	-27.70865	0.5106382978723404	-25.60495	0.6097560975609756	-28.6254	0.5319148936170213	-27.45775	0.5319148936170213	-23.86795	0.6808510638297872	-27.24545	0.7045454545454546	-25.8655	0.6842105263157895	-25.04525	0.5909090909090909	-25.9234
0.6875	-28.01745	0.5531914893617021	-25.77865	0.6341463414634146	-29.2044	0.574468085106383	-28.1622	0.574468085106383	-23.96445	0.7021276595744681	-27.36125	0.7272727272727273	-25.962	0.7368421052631579	-25.3444	0.6136363636363636	-26.0199
0.7083333333333334	-28.42275	0.574468085106383	-25.87515	0.6585365853658537	-29.38775	0.6382978723404256	-28.3745	0.5957446808510638	-24.13815	0.723404255319149	-27.45775	0.7727272727272727	-26.6375	0.7894736842105263	-25.4409	0.6363636363636364	-26.1164
0.75	-28.8184	0.5957446808510638	-26.18395	0.6829268292682927	-30.3817	0.6595744680851063	-28.664	0.6382978723404256	-24.225	0.7446808510638298	-27.8534	0.7954545454545454	-26.734	0.8157894736842105	-25.6532	0.6590909090909091	-26.5024
0.7708333333333334	-29.19475	0.6170212765957447	-26.28045	0.7073170731707317	-31.2695	0.6808510638297872	-28.77015	0.6595744680851063	-24.3215	0.7659574468085106	-27.9499	0.8181818181818182	-27.12965	0.8421052631578947	-26.1357	0.6818181818181818	-26.5989
0.7916666666666666	-29.6869	0.6382978723404256	-26.39625	0.7317073170731707	-31.752	0.7021276595744681	-29.05	0.7021276595744681	-25.12245	0.7872340425531915	-28.0464	0.8409090909090909	-27.24545	0.868421052631579	-26.35765	0.7045454545454546	-26.6954
0.8125	-29.8992	0.6595744680851063	-26.49275	0.7560975609756098	-32.05115	0.723404255319149	-29.44565	0.723404255319149	-25.39265	0.8085106382978723	-28.2587	0.8636363636363636	-28.11395	0.8947368421052632	-26.84015	0.7272727272727273	-26.8112
0.8333333333333334	-29.9957	0.6808510638297872	-26.85945	0.8048780487804879	-33.01615	0.7659574468085106	-29.54215	0.7446808510638298	-25.50845	0.8297872340425532	-28.6254	0.8863636363636364	-28.5289	0.9473684210526315	-26.93665	0.7727272727272727	-27.0235
0.8541666666666666	-30.3045	0.7021276595744681	-27.05245	0.8292682926829268	-33.13195	0.7872340425531915	-29.85095	0.7659574468085106	-25.70145	0.851063829787234	-29.1465	0.9090909090909091	-28.6254	1	-27.34195	0.7954545454545454	-27.2165
0.8958333333333334	-30.98965	0.723404255319149	-27.26475	0.8536585365853658	-33.53725	0.8085106382978723	-29.94745	0.7872340425531915	-26.4059	0.8723404255319149	-29.85095	0.9318181818181818	-29.17545			0.8409090909090909	-27.32265
0.9166666666666666	-31.58795	0.7446808510638298	-27.34195	0.8780487804878049	-33.61445	0.8297872340425532	-30.06325	0.8297872340425532	-26.49275	0.8936170212765957	-29.94745	0.9545454545454546	-29.48425			0.8636363636363636	-27.51565
0.9375	-31.76165	0.7659574468085106	-27.74725	0.9024390243902439	-33.9715	0.851063829787234	-30.15975	0.851063829787234	-26.58925	0.9148936170212766	-30.21765	0.9772727272727273	-30.5554			0.8863636363636364	-27.61215
0.9583333333333334	-31.85815	0.7872340425531915	-28.1429	0.926829268292683	-34.17415	0.8723404255319149	-31.2502	0.8936170212765957	-27.1007	0.9361702127659575	-30.52645	1	-32.91965			0.9090909090909091	-28.67365
0.9791666666666666	-32.48540000000001	0.8085106382978723	-28.42275	0.975609756097561	-34.3575	0.9148936170212766	-31.6555	0.9148936170212766	-27.2937	0.9574468085106383	-32.2345					0.9318181818181818	-28.98245
1	-33.24775	0.8297872340425532	-28.7219	1	-34.65665	0.9574468085106383	-33.49865	0.9361702127659575	-27.506	0.9787234042553191	-32.82315					0.9545454545454546	-29.65795
		0.851063829787234	-29.3974			0.9787234042553191	-33.73025000000001	0.9574468085106383	-28.48065	1	-34.65665					0.9772727272727273	-30.25625
		0.8936170212765957	-29.8027			1	-33.80745	0.9787234042553191	-28.98245							1	-32.8907
		0.9148936170212766	-30.4782					1	-29.56145								
		0.9361702127659575	-30.594														
		0.9574468085106383	-30.787														
		0.9787234042553191	-32.14765														
		1	-33.22845														
