# Supplementary material for: Cleaning up our water: reducing interferences from nonhomogeneous freezing of “pure” water in droplet freezing assays of ice-nucleating particles
Source: Copernicus journal article supplement (doi:10.5194/amt-11-5315-2018), 2018-09-24
Supplement: Supplementary file 2 [file amt-11-5315-2018-supplement.zip › AMTData/Fig4_0705.txt]

Frozen_Fraction	Tactual	Frozen_Fraction	Tactual	Frozen_Fraction	Tactual
0.03225806451612903	-17.7209	0.0303030303030303	-16.74625	0.02857142857142857	-23.3565
0.06451612903225806	-18.9175	0.06060606060606061	-17.4314	0.05714285714285714	-23.8197
0.09677419354838709	-20.1527	0.09090909090909091	-21.7932	0.08571428571428572	-24.225
0.1290322580645161	-22.78715	0.1212121212121212	-22.102	0.1142857142857143	-24.27325
0.1612903225806452	-22.99945	0.1515151515151515	-22.488	0.1428571428571428	-24.4759
0.1935483870967742	-23.26965	0.1818181818181818	-22.88365	0.1714285714285714	-24.6689
0.2258064516129032	-23.50125	0.2121212121212121	-23.40475	0.2	-24.8812
0.2580645161290323	-23.67495	0.2424242424242424	-23.6074	0.2285714285714286	-25.383
0.2903225806451613	-23.77145	0.2727272727272727	-23.88725	0.2571428571428571	-25.4602
0.3225806451612903	-24.08025	0.3333333333333333	-24.35045	0.2857142857142857	-25.6532
0.3870967741935484	-24.225	0.3636363636363636	-25.14175	0.3428571428571429	-25.8462
0.4193548387096774	-24.71715	0.3939393939393939	-25.6532	0.3714285714285714	-25.962
0.4516129032258064	-24.92945	0.4242424242424243	-25.7497	0.4	-26.155
0.4838709677419355	-25.91375	0.4545454545454545	-26.3287	0.4285714285714285	-26.2322
0.5161290322580645	-26.3094	0.4848484848484849	-26.734	0.4571428571428571	-26.4252
0.5483870967741935	-26.7919	0.5151515151515151	-27.43845	0.4857142857142857	-26.541
0.5806451612903226	-26.9849	0.5454545454545454	-27.51565	0.5142857142857142	-26.6375
0.6129032258064516	-27.2937	0.5757575757575758	-27.61215	0.5428571428571428	-26.8305
0.6451612903225806	-27.3709	0.6060606060606061	-28.49995	0.5714285714285714	-26.9077
0.6774193548387096	-28.857	0.6363636363636364	-28.78945	0.6	-27.03315
0.7096774193548387	-29.27195	0.6666666666666666	-29.00175	0.6285714285714286	-27.34195
0.7419354838709677	-29.36845	0.696969696969697	-29.09825	0.6571428571428571	-27.43845
0.7741935483870968	-29.67725	0.7272727272727273	-29.27195	0.6857142857142857	-27.51565
0.8064516129032258	-29.7834	0.7878787878787878	-29.58075	0.7142857142857143	-28.01745
0.8387096774193549	-29.8799	0.8181818181818182	-31.366	0.7428571428571429	-28.19115
0.8709677419354839	-29.9764	0.8484848484848485	-31.4432	0.7714285714285715	-28.28765
0.9032258064516129	-32.24415	0.8787878787878788	-31.6362	0.8	-28.90525
0.967741935483871	-32.4275	0.9090909090909091	-32.72665	0.8285714285714286	-29.00175
1	-34.38645	0.9696969696969697	-32.82315	0.9142857142857143	-29.3009
		1	-34.068	0.9428571428571428	-29.77375
				0.9714285714285714	-30.1887
				1	-32.05115
