# Supplementary material for: Cleaning up our water: reducing interferences from nonhomogeneous freezing of “pure” water in droplet freezing assays of ice-nucleating particles
Source: Copernicus journal article supplement (doi:10.5194/amt-11-5315-2018), 2018-09-24
Supplement: Supplementary file 2 [file amt-11-5315-2018-supplement.zip › AMTData/Fig7_VasNoOil_HPLC_FF_INP.txt]

CombineTemp	CombineFF	IN_conc_permLStep	Temp_CINStep
-0	0	0	-0
-0.5	0	0	-0.5
-1	0	0	-1
-1.5	0	0	-1.5
-2	0	0	-2
-2.5	0	0	-2.5
-3	0	0	-3
-3.5	0	0	-3.5
-4	0	0	-4
-4.5	0	0	-4.5
-5	0	0	-5
-5.5	0.012658228	15.324214	-5.5
-6	0.012658228	15.324214	-6
-6.5	0.012658228	15.324214	-6.5
-7	0.012658228	15.324214	-7
-7.5	0.012658228	15.324214	-7.5
-8	0.012658228	15.324214	-8
-8.5	0.012658228	15.324214	-8.5
-9	0.012658228	15.324214	-9
-9.5	0.012658228	15.324214	-9.5
-10	0.037974682	46.571022	-10
-10.5	0.037974682	46.571022	-10.5
-11	0.050632913	62.504166	-11
-11.5	0.10126583	128.43489	-11.5
-12	0.10126583	128.43489	-12
-12.5	0.10126583	128.43489	-12.5
-13	0.12658228	162.80678	-13
-13.5	0.12658228	162.80678	-13.5
-14	0.17721519	234.64511	-14
-14.5	0.20253165	272.23987	-14.5
-15	0.24050634	330.93124	-15
-15.5	0.25316456	351.14911	-15.5
-16	0.29113925	413.92514	-16
-16.5	0.31645569	457.67303	-16.5
-17	0.34177214	503.07217	-17
-17.5	0.35443038	526.43085	-17.5
-18	0.36708862	550.25214	-18
-18.5	0.39240506	599.35834	-18.5
-19	0.4050633	624.6842	-19
-19.5	0.4050633	624.6842	-19.5
-20	0.41772151	650.55475	-20
-20.5	0.4556962	731.68219	-20.5
-21	0.48101267	788.97565	-21
-21.5	0.51898736	880.38171	-21.5
-22	0.51898736	880.38171	-22
-22.5	0.55696201	979.30872	-22.5
-23	0.56962025	1014.1788	-23
-23.5	0.59493673	1087.1063	-23.5
-24	0.63291138	1205.5232	-24
-24.5	0.64556962	1247.7358	-24.5
-25	0.6708861	1336.8829	-25
-25.5	0.6708861	1336.8829	-25.5
-26	0.68354428	1384.0627	-26
-26.5	0.69620252	1433.1689	-26.5
-27	0.69620252	1433.1689	-27
-27.5	0.75949365	1714.1923	-27.5
-28	0.78481013	1847.9895	-28
-28.5	0.82278478	2081.5464	-28.5
-29	0.92405063	3100.7903	-29
-29.5	0.93670887	3320.1113	-29.5
-30	0.94936711	3588.5386	-30
-30.5	0.97468352	4422.3481	-30.5
-31	0.97468352	4422.3481	-31
-31.5	0.98734176	5256.1587	-31.5
-32	0.98734176	5256.1587	-32
-32.5	0.98734176	5256.1587	-32.5
-33	1	inf	-33
-33.5	1	inf	-33.5
-34	1	inf	-34
-34.5	1	inf	-34.5
-35	1	inf	-35
-35.5	1	inf	-35.5
-36	1	inf	-36
-36.5	1	inf	-36.5
-37	1	inf	-37
-37.5	1	inf	-37.5
-38	1	inf	-38
-38.5	1	inf	-38.5
-39	1	inf	-39
-39.5	1	inf	-39.5
-40	1	inf	-40
