# Supplementary material for: Cleaning up our water: reducing interferences from nonhomogeneous freezing of “pure” water in droplet freezing assays of ice-nucleating particles
Source: Copernicus journal article supplement (doi:10.5194/amt-11-5315-2018), 2018-09-24
Supplement: Supplementary file 2 [file amt-11-5315-2018-supplement.zip › AMTData/Fig7_VasNoOil_MilliQ_FF_INP.txt]

CombineTemp	CombineFF	IN_conc_permLStep	Temp_CINStep
-0	0	0	-0
-0.5	0	0	-0.5
-1	0	0	-1
-1.5	0	0	-1.5
-2	0	0	-2
-2.5	0	0	-2.5
-3	0	0	-3
-3.5	0	0	-3.5
-4	0	0	-4
-4.5	0	0	-4.5
-5	0	0	-5
-5.5	0	0	-5.5
-6	0	0	-6
-6.5	0	0	-6.5
-7	0	0	-7
-7.5	0	0	-7.5
-8	0	0	-8
-8.5	0	0	-8.5
-9	0	0	-9
-9.5	0	0	-9.5
-10	0	0	-10
-10.5	0	0	-10.5
-11	0	0	-11
-11.5	0.02	31.635378	-11.5
-12	0.1	164.98383	-12
-12.5	0.12	200.17401	-12.5
-13	0.14	236.17326	-13
-13.5	0.14	236.17326	-13.5
-14	0.16	273.01962	-14
-14.5	0.18000001	310.75394	-14.5
-15	0.22	389.06512	-15
-15.5	0.23999999	429.74008	-15.5
-16	0.25999999	471.49985	-16
-16.5	0.28	514.40387	-16.5
-17	0.31999999	603.90808	-17
-17.5	0.31999999	603.90808	-17.5
-18	0.31999999	603.90808	-18
-18.5	0.31999999	603.90808	-18.5
-19	0.34	650.65479	-19
-19.5	0.36000001	698.84009	-19.5
-20	0.38	748.5553	-20
-20.5	0.38	748.5553	-20.5
-21	0.40000001	799.90082	-21
-21.5	0.41999999	852.98712	-21.5
-22	0.41999999	852.98712	-22
-22.5	0.44	907.93658	-22.5
-23	0.47999999	1023.9821	-23
-23.5	0.47999999	1023.9821	-23.5
-24	0.47999999	1023.9821	-24
-24.5	0.47999999	1023.9821	-24.5
-25	0.51999998	1149.3208	-25
-25.5	0.51999998	1149.3208	-25.5
-26	0.56	1285.5718	-26
-26.5	0.60000002	1434.8179	-26.5
-27	0.60000002	1434.8179	-27
-27.5	0.62	1515.1379	-27.5
-28	0.62	1515.1379	-28
-28.5	0.66000003	1689.306	-28.5
-29	0.66000003	1689.306	-29
-29.5	0.66000003	1689.306	-29.5
-30	0.69999999	1885.2985	-30
-30.5	0.69999999	1885.2985	-30.5
-31	0.75999999	2234.7185	-31
-31.5	0.77999997	2370.9692	-31.5
-32	0.88	3320.1162	-32
-32.5	0.92000002	3955.0337	-32.5
-33	0.95999998	5040.4302	-33
-33.5	1	inf	-33.5
-34	1	inf	-34
-34.5	1	inf	-34.5
-35	1	inf	-35
-35.5	1	inf	-35.5
-36	1	inf	-36
-36.5	1	inf	-36.5
-37	1	inf	-37
-37.5	1	inf	-37.5
-38	1	inf	-38
-38.5	1	inf	-38.5
-39	1	inf	-39
-39.5	1	inf	-39.5
-40	1	inf	-40
