# Supplementary material for: Cleaning up our water: reducing interferences from nonhomogeneous freezing of “pure” water in droplet freezing assays of ice-nucleating particles
Source: Copernicus journal article supplement (doi:10.5194/amt-11-5315-2018), 2018-09-24
Supplement: Supplementary file 2 [file amt-11-5315-2018-supplement.zip › AMTData/Fig8_GoldCS_Large_FF_INP.txt]

Temp	INPavg	INPsdev	Temp	INPavg	INPsdev
-0	0	0	-0	0	0
-0.5	0	0	-0.5	0	0
-1	0	0	-1	0	0
-1.5	0	0	-1.5	0	0
-2	0	0	-2	0	0
-2.5	0	0	-2.5	0	0
-3	0	0	-3	0	0
-3.5	0	0	-3.5	0	0
-4	0	0	-4	0	0
-4.5	0	0	-4.5	0	0
-5	0	0	-5	0	0
-5.5	0	0	-5.5	0	0
-6	0	0	-6	0	0
-6.5	0	0	-6.5	0	0
-7	0	0	-7	0	0
-7.5	0	0	-7.5	0	0
-8	0	0	-8	0	0
-8.5	0	0	-8.5	0	0
-9	0	0	-9	0	0
-9.5	0	0	-9.5	0	0
-10	0	0	-10	0	0
-10.5	0	0	-10.5	0	0
-11	0	0	-11	0	0
-11.5	0	0	-11.5	0	0
-12	0	0	-12	0	0
-12.5	0	0	-12.5	0	0
-13	0	0	-13	0	0
-13.5	0	0	-13.5	0	0
-14	0	0	-14	0	0
-14.5	0	0	-14.5	0	0
-15	0	0	-15	0	0
-15.5	0	0	-15.5	0	0
-16	0	0	-16	0	0
-16.5	0	0	-16.5	0	0
-17	0	0	-17	0	0
-17.5	0.013329304	0.02308703	-17.5	7.5590301	13.092624
-18	0.017361229	0.03007053	-18	7.5590301	13.092624
-18.5	0.021393156	0.037054032	-18.5	7.5590301	13.092624
-19	0.023386167	0.040506031	-19	15.383343	26.644732
-19.5	0.024851404	0.043043893	-19.5	15.383343	26.644732
-20	0.026316641	0.045581758	-20	15.383343	26.644732
-20.5	0.041048918	0.041686822	-20.5	20.536068	23.490318
-21	0.062167279	0.023132388	-21	33.997772	11.069066
-21.5	0.07650011	0.013672764	-21.5	33.997772	11.069066
-22	0.092193529	0.0062106536	-22	42.4949	9.8386135
-22.5	0.11266958	0.013857839	-22.5	59.462601	24.533859
-23	0.15178245	0.027647076	-23	96.940971	29.406126
-23.5	0.20760623	0.076986201	-23.5	131.23099	66.965126
-24	0.27028847	0.10366364	-24	200.40552	102.92921
-24.5	0.3067199	0.11089828	-24.5	223.55719	109.02751
-25	0.33121887	0.10059063	-25	242.34279	107.41176
-25.5	0.35515276	0.083174482	-25.5	255.31776	84.94014
-26	0.40717331	0.10049602	-26	314.7518	118.6804
-26.5	0.50974452	0.15530159	-26.5	442.55319	196.56873
-27	0.55074292	0.15474264	-27	496.68884	204.45653
-27.5	0.59677225	0.16045487	-27.5	566.81323	239.07503
-28	0.66706872	0.18705586	-28	704.13562	341.84949
-28.5	0.70190275	0.16188452	-28.5	799.58325	349.77872
-29	0.73527133	0.12461514	-29	821.73383	312.5661
-29.5	0.78805268	0.095843174	-29.5	960.23395	285.17401
-30	0.82498461	0.077656984	-30	1054.403	305.77731
-30.5	0.86677569	0.051892802	-30.5	1246.5303	333.75439
-31	0.88924748	0.052975159	-31	1325.2745	288.33014
-31.5	0.91932851	0.042556118	-31.5	1545.8063	425.77142
-32	0.93417084	0.04290878	-32	1609.9507	394.35986
-32.5	0.95751458	0.036900666	-32.5	1740.3058	260.24911
-33	0.98581541	0.024568472	-33	1811.442	
-33.5	1	0	-33.5		
-34	1	0	-34		
-34.5	1	0	-34.5		
-35	1	0	-35		
-35.5	1	0	-35.5		
-36	1	0	-36		
-36.5	1	0	-36.5		
-37	1	0	-37		
-37.5	1	0	-37.5		
-38	1	0	-38		
-38.5	1	0	-38.5		
-39	1	0	-39		
-39.5	1	0	-39.5		
-40	1	0	-40		
