# Supplementary material for: Cleaning up our water: reducing interferences from nonhomogeneous freezing of “pure” water in droplet freezing assays of ice-nucleating particles
Source: Copernicus journal article supplement (doi:10.5194/amt-11-5315-2018), 2018-09-24
Supplement: Supplementary file 2 [file amt-11-5315-2018-supplement.zip › AMTData/Fig8_GoldWafer_FF_INP.txt]

AllTemp	AllFF	IN_conc_permLStep	Temp_CINStep
-0	0	0	-0
-0.5	0	0	-0.5
-1	0	0	-1
-1.5	0	0	-1.5
-2	0	0	-2
-2.5	0	0	-2.5
-3	0	0	-3
-3.5	0	0	-3.5
-4	0	0	-4
-4.5	0	0	-4.5
-5	0	0	-5
-5.5	0	0	-5.5
-6	0	0	-6
-6.5	0	0	-6.5
-7	0	0	-7
-7.5	0	0	-7.5
-8	0	0	-8
-8.5	0	0	-8.5
-9	0	0	-9
-9.5	0	0	-9.5
-10	0	0	-10
-10.5	0	0	-10.5
-11	0	0	-11
-11.5	0	0	-11.5
-12	0	0	-12
-12.5	0	0	-12.5
-13	0	0	-13
-13.5	0	0	-13.5
-14	0	0	-14
-14.5	0	0	-14.5
-15	0	0	-15
-15.5	0	0	-15.5
-16	0	0	-16
-16.5	0	0	-16.5
-17	0	0	-17
-17.5	0	0	-17.5
-18	0	0	-18
-18.5	0	0	-18.5
-19	0	0	-19
-19.5	0	0	-19.5
-20	0	0	-20
-20.5	0	0	-20.5
-21	0.0419726	613.06934	-21
-21.5	0.045840297	613.06934	-21.5
-22	0.04970799	613.06934	-22
-22.5	0.053575683	613.06934	-22.5
-23	0.057443377	613.06934	-23
-23.5	0.06131107	613.06934	-23.5
-24	0.065178767	613.06934	-24
-24.5	0.06904646	613.06934	-24.5
-25	0.072914153	613.06934	-25
-25.5	0.076781847	613.06934	-25.5
-26	0.08064954	613.06934	-26
-26.5	0.089885019	1253.395	-26.5
-27	0.11128876	1253.395	-27
-27.5	0.12928285	1923.5137	-27.5
-28	0.14119953	1923.5137	-28
-28.5	0.15311621	1923.5137	-28.5
-29	0.16503289	1923.5137	-29
-29.5	0.23282933	3365.2112	-29.5
-30	0.35441718	5840.7065	-30
-30.5	0.48451102	8831.7422	-30.5
-31	0.66704983	15825.461	-31
-31.5	0.77870369	19969.508	-31.5
-32	0.93360645	35794.973	-32
-32.5	0.97471178	45779.715	-32.5
-33	1	inf	-33
-33.5	1	inf	-33.5
-34	1	inf	-34
-34.5	1	inf	-34.5
-35	1	inf	-35
-35.5	1	inf	-35.5
-36	1	inf	-36
-36.5	1	inf	-36.5
-37	1	inf	-37
-37.5	1	inf	-37.5
-38	1	inf	-38
-38.5	1	inf	-38.5
-39	1	inf	-39
-39.5	1	inf	-39.5
-40	1	inf	-40
