# Supplementary material for: Cleaning up our water: reducing interferences from nonhomogeneous freezing of “pure” water in droplet freezing assays of ice-nucleating particles
Source: Copernicus journal article supplement (doi:10.5194/amt-11-5315-2018), 2018-09-24
Supplement: Supplementary file 2 [file amt-11-5315-2018-supplement.zip › AMTData/Fig10_Microfluidic_FF_INP.txt]

Temp05	FF05	FFstd05	INPConc05	INPDev
-35	0.9988888889999999	0.003333333	1190394.846276271	584.2957576600127
-34.5	0.96	0.10511898	563291.7920401131	19435.89290142628
-34	0.676666667	0.26471683	197583.4861588944	53811.33158633276
-33.5	0.326666667	0.239008368	69213.6758479314	47797.28662656508
-33	0.16	0.090691786	30511.22107112252	16637.1162811497
-32.5	0.112222222	0.065532011	20830.49359861164	11860.89211633944
-32	0.09888888899999999	0.060092521	18221.80285608809	10845.20017705388
-31.5	0.086666667	0.054313902	15864.19127109125	9772.603304902912
-31	0.073333333	0.045825757	13327.96654299025	8208.904162579091
-30.5	0.062222222	0.040242322	11242.16792200026	7187.881442148417
-30	0.05	0.033166248	8976.14362504571	5902.405686153826
-29.5	0.043333333	0.026457513	7752.387287710398	4692.321416347476
-29	0.036666667	0.022912878	6537.129508896097	4056.322489581195
-28.5	0.028888889	0.01964971	5129.91333787441	3472.862410344367
-28	0.021111111	0.014529663	3733.922942777974	2561.291962324646
-27.5	0.014444444	0.012360331	2546.159719564103	2176.492821092721
-27	0.013333333	0.01	2348.980637515176	1758.772938609907
-26.5	0.01	0.007071068	1758.772938609907	1241.80733182272
-26	0.006666667	0.007071068	1170.549134673641	1241.80733182272
