# Supplementary material for: Cleaning up our water: reducing interferences from nonhomogeneous freezing of “pure” water in droplet freezing assays of ice-nucleating particles
Source: Copernicus journal article supplement (doi:10.5194/amt-11-5315-2018), 2018-09-24
Supplement: Supplementary file 2 [file amt-11-5315-2018-supplement.zip › AMTData/Pf_theoreticalvalues.txt]

Pf_1uL	Pf_01uL	Pf_6nL	TempC
0	0	0	-23.14999999999998
0	0	0	-23.17999877929685
0	0	0	-23.20999755859373
0	0	0	-23.2399963378906
0	0	0	-23.26999511718748
0	0	0	-23.29999389648435
0	0	0	-23.32999267578123
0	0	0	-23.36000671386716
0	0	0	-23.39000549316404
0	0	0	-23.42000427246091
0	0	0	-23.45000305175779
0	0	0	-23.48000183105466
0	0	0	-23.51000061035154
0	0	0	-23.53999938964841
0	0	0	-23.56999816894529
0	0	0	-23.59999694824216
0	0	0	-23.62999572753904
0	0	0	-23.65999450683591
0	0	0	-23.68999328613279
0	0	0	-23.72000732421873
0	0	0	-23.7500061035156
0	0	0	-23.78000488281248
0	0	0	-23.81000366210935
0	0	0	-23.84000244140623
0	0	0	-23.8700012207031
0	0	0	-23.89999999999998
0	0	0	-23.92999877929685
0	0	0	-23.95999755859373
0	0	0	-23.9899963378906
0	0	0	-24.01999511718748
0	0	0	-24.04999389648435
0	0	0	-24.07999267578123
0	0	0	-24.11000671386716
0	0	0	-24.14000549316404
0	0	0	-24.17000427246091
0	0	0	-24.20000305175779
0	0	0	-24.23000183105466
0	0	0	-24.26000061035154
0	0	0	-24.28999938964841
0	0	0	-24.31999816894529
0	0	0	-24.34999694824216
0	0	0	-24.37999572753904
0	0	0	-24.40999450683591
0	0	0	-24.43999328613279
0	0	0	-24.47000732421873
0	0	0	-24.5000061035156
0	0	0	-24.53000488281248
0	0	0	-24.56000366210935
0	0	0	-24.59000244140623
0	0	0	-24.6200012207031
0	0	0	-24.64999999999998
0	0	0	-24.67999877929685
0	0	0	-24.70999755859373
0	0	0	-24.7399963378906
0	0	0	-24.76999511718748
0	0	0	-24.79999389648435
0	0	0	-24.82999267578123
0	0	0	-24.86000671386716
0	0	0	-24.89000549316404
0	0	0	-24.92000427246091
0	0	0	-24.95000305175779
0	0	0	-24.98000183105466
0	0	0	-25.01000061035154
0	0	0	-25.03999938964841
0	0	0	-25.06999816894529
0	0	0	-25.09999694824216
0	0	0	-25.12999572753904
0	0	0	-25.15999450683591
0	0	0	-25.18999328613279
0	0	0	-25.22000732421873
0	0	0	-25.2500061035156
0	0	0	-25.28000488281248
0	0	0	-25.31000366210935
0	0	0	-25.34000244140623
0	0	0	-25.3700012207031
0	0	0	-25.39999999999998
0	0	0	-25.42999877929685
0	0	0	-25.45999755859373
0	0	0	-25.4899963378906
0	0	0	-25.51999511718748
0	0	0	-25.54999389648435
0	0	0	-25.57999267578123
0	0	0	-25.61000671386716
0	0	0	-25.64000549316404
0	0	0	-25.67000427246091
0	0	0	-25.70000305175779
0	0	0	-25.73000183105466
0	0	0	-25.76000061035154
0	0	0	-25.78999938964841
0	0	0	-25.81999816894529
0	0	0	-25.84999694824216
0	0	0	-25.87999572753904
0	0	0	-25.90999450683591
0	0	0	-25.93999328613279
0	0	0	-25.97000732421873
0	0	0	-26.0000061035156
0	0	0	-26.03000488281248
0	0	0	-26.06000366210935
0	0	0	-26.09000244140623
0	0	0	-26.1200012207031
0	0	0	-26.14999999999998
0	0	0	-26.17999877929685
0	0	0	-26.20999755859373
0	0	0	-26.2399963378906
0	0	0	-26.26999511718748
0	0	0	-26.29999389648435
0	0	0	-26.32999267578123
0	0	0	-26.36000671386716
0	0	0	-26.39000549316404
0	0	0	-26.42000427246091
0	0	0	-26.45000305175779
0	0	0	-26.48000183105466
0	0	0	-26.51000061035154
0	0	0	-26.53999938964841
0	0	0	-26.56999816894529
0	0	0	-26.59999694824216
0	0	0	-26.62999572753904
0	0	0	-26.65999450683591
0	0	0	-26.68999328613279
0	0	0	-26.72000732421873
0	0	0	-26.7500061035156
0	0	0	-26.78000488281248
0	0	0	-26.81000366210935
0	0	0	-26.84000244140623
0	0	0	-26.8700012207031
0	0	0	-26.89999999999998
0	0	0	-26.92999877929685
0	0	0	-26.95999755859373
0	0	0	-26.9899963378906
0	0	0	-27.01999511718748
0	0	0	-27.04999389648435
0	0	0	-27.07999267578123
0	0	0	-27.11000671386716
0	0	0	-27.14000549316404
0	0	0	-27.17000427246091
0	0	0	-27.20000305175779
0	0	0	-27.23000183105466
0	0	0	-27.26000061035154
0	0	0	-27.28999938964841
0	0	0	-27.31999816894529
0	0	0	-27.34999694824216
0	0	0	-27.37999572753904
0	0	0	-27.40999450683591
0	0	0	-27.43999328613279
0	0	0	-27.47000732421873
0	0	0	-27.5000061035156
0	0	0	-27.53000488281248
0	0	0	-27.56000366210935
0	0	0	-27.59000244140623
0	0	0	-27.6200012207031
0	0	0	-27.64999999999998
0	0	0	-27.67999877929685
0	0	0	-27.70999755859373
0	0	0	-27.7399963378906
0	0	0	-27.76999511718748
0	0	0	-27.79999389648435
0	0	0	-27.82999267578123
0	0	0	-27.86000671386716
0	0	0	-27.89000549316404
0	0	0	-27.92000427246091
0	0	0	-27.95000305175779
0	0	0	-27.98000183105466
0	0	0	-28.01000061035154
0	0	0	-28.03999938964841
0	0	0	-28.06999816894529
0	0	0	-28.09999694824216
0	0	0	-28.12999572753904
0	0	0	-28.15999450683591
0	0	0	-28.18999328613279
0	0	0	-28.22000732421873
0	0	0	-28.2500061035156
0	0	0	-28.28000488281248
0	0	0	-28.31000366210935
0	0	0	-28.34000244140623
0	0	0	-28.3700012207031
0	0	0	-28.39999999999998
0	0	0	-28.42999877929685
0	0	0	-28.45999755859373
0	0	0	-28.4899963378906
0	0	0	-28.51999511718748
0	0	0	-28.54999389648435
0	0	0	-28.57999267578123
0	0	0	-28.61000671386716
0	0	0	-28.64000549316404
0	0	0	-28.67000427246091
0	0	0	-28.70000305175779
1.110223e-16	0	0	-28.73000183105466
1.110223e-16	0	0	-28.76000061035154
1.110223e-16	0	0	-28.78999938964841
1.110223e-16	0	0	-28.81999816894529
2.220446e-16	0	0	-28.84999694824216
3.3306691e-16	0	0	-28.87999572753904
4.4408921e-16	0	0	-28.90999450683591
5.5511151e-16	1.110223e-16	0	-28.93999328613279
7.7715612e-16	1.110223e-16	0	-28.97000732421873
9.9920072e-16	1.110223e-16	0	-29.0000061035156
1.4432899e-15	1.110223e-16	0	-29.03000488281248
1.8873791e-15	2.220446e-16	0	-29.06000366210935
2.553513e-15	2.220446e-16	0	-29.09000244140623
3.4416914e-15	3.3306691e-16	0	-29.1200012207031
4.6629367e-15	4.4408921e-16	0	-29.14999999999998
6.2172489e-15	6.6613381e-16	0	-29.17999877929685
8.3266727e-15	7.7715612e-16	0	-29.20999755859373
1.110223e-14	1.110223e-15	1.110223e-16	-29.2399963378906
1.4876989e-14	1.4432899e-15	1.110223e-16	-29.26999511718748
1.976197e-14	1.9984014e-15	1.110223e-16	-29.29999389648435
2.6423308e-14	2.6645353e-15	1.110223e-16	-29.32999267578123
3.5083048e-14	3.5527137e-15	2.220446e-16	-29.36000671386716
4.6740389e-14	4.6629367e-15	3.3306691e-16	-29.39000549316404
6.2061467e-14	6.2172489e-15	3.3306691e-16	-29.42000427246091
8.2267526e-14	8.2156504e-15	4.4408921e-16	-29.45000305175779
1.0891288e-13	1.0880186e-14	6.6613381e-16	-29.48000183105466
1.4410695e-13	1.4432899e-14	8.8817842e-16	-29.51000061035154
1.9040325e-13	1.9095836e-14	1.110223e-15	-29.53999938964841
2.5124347e-13	2.509104e-14	1.5543122e-15	-29.56999816894529
3.3117953e-13	3.3084646e-14	1.9984014e-15	-29.59999694824216
4.3598458e-13	4.3631765e-14	2.6645353e-15	-29.62999572753904
5.7309713e-13	5.7287508e-14	3.4416914e-15	-29.65999450683591
7.5262019e-13	7.5273121e-14	4.5519144e-15	-29.68999328613279
9.8721031e-13	9.8698827e-14	5.884182e-15	-29.72000732421873
1.2932988e-12	1.2934098e-13	7.7715612e-15	-29.7500061035156
1.6922019e-12	1.6919799e-13	1.010303e-14	-29.78000488281248
2.2114532e-12	2.2115643e-13	1.3322676e-14	-29.81000366210935
2.8866909e-12	2.8865799e-13	1.7319479e-14	-29.84000244140623
3.7637671e-12	3.7636561e-13	2.2537527e-14	-29.8700012207031
4.9016347e-12	4.9016347e-13	2.942091e-14	-29.89999999999998
6.3760108e-12	6.3760108e-13	3.8302694e-14	-29.92999877929685
8.2842622e-12	8.2844842e-13	4.9737992e-14	-29.95999755859373
1.0751511e-11	1.07514e-12	6.4503958e-14	-29.9899963378906
1.3937518e-11	1.393774e-12	8.3599794e-14	-30.01999511718748
1.8047119e-11	1.8046675e-12	1.0824674e-13	-30.04999389648435
2.3342217e-11	2.3342439e-12	1.3999912e-13	-30.07999267578123
3.0160985e-11	3.0161429e-12	1.8096635e-13	-30.11000671386716
3.8923087e-11	3.8923309e-12	2.3359092e-13	-30.14000549316404
5.0174864e-11	5.0175419e-12	3.0109248e-13	-30.17000427246091
6.4608097e-11	6.4608319e-12	3.8768988e-13	-30.20000305175779
8.3101637e-11	8.3101304e-12	4.9860116e-13	-30.23000183105466
1.0677215e-10	1.0677237e-11	6.4059869e-13	-30.26000061035154
1.3703605e-10	1.3703594e-11	8.2223117e-13	-30.28999938964841
1.7568791e-10	1.7568835e-11	1.0541568e-12	-30.31999816894529
2.2499957e-10	2.2500002e-11	1.3500312e-12	-30.34999694824216
2.8784397e-10	2.8784419e-11	1.7270629e-12	-30.37999572753904
3.6784964e-10	3.6785019e-11	2.2071234e-12	-30.40999450683591
4.6959536e-10	4.6959547e-11	2.817524e-12	-30.43999328613279
5.9892713e-10	5.9892757e-11	3.5935699e-12	-30.47000732421873
7.629829e-10	7.6298301e-11	4.5778936e-12	-30.5000061035156
9.7096386e-10	9.7096442e-11	5.8257843e-12	-30.53000488281248
1.2343579e-09	1.2343582e-10	7.4061868e-12	-30.56000366210935
1.5675853e-09	1.567585e-10	9.4054764e-12	-30.59000244140623
1.9887292e-09	1.9887292e-10	1.1932344e-11	-30.6200012207031
2.5204427e-09	2.5204427e-10	1.5122681e-11	-30.64999999999998
3.1910752e-09	3.1910752e-10	1.9146462e-11	-30.67999877929685
4.0360684e-09	4.0360681e-10	2.4216407e-11	-30.70999755859373
5.0996865e-09	5.0996862e-10	3.059808e-11	-30.7399963378906
6.4371575e-09	6.4371575e-10	3.8622994e-11	-30.76999511718748
8.1173201e-09	8.1173201e-10	4.870393e-11	-30.79999389648435
1.0225898e-08	1.0225898e-09	6.1355365e-11	-30.82999267578123
1.2871039e-08	1.287104e-09	7.7226225e-11	-30.86000671386716
1.6182623e-08	1.6182624e-09	9.7095776e-11	-30.89000549316404
2.0326423e-08	2.0326425e-09	1.2195855e-10	-30.92000427246091
2.5506559e-08	2.5506557e-09	1.5303936e-10	-30.95000305175779
3.1975969e-08	3.1975969e-09	1.9185575e-10	-30.98000183105466
4.0047794e-08	4.0047796e-09	2.4028679e-10	-31.01000061035154
5.0109339e-08	5.0109339e-09	3.0065606e-10	-31.03999938964841
6.2639167e-08	6.2639165e-09	3.7583503e-10	-31.06999816894529
7.8228055e-08	7.8228064e-09	4.6936832e-10	-31.09999694824216
9.7604655e-08	9.7604653e-09	5.8562799e-10	-31.12999572753904
1.2166676e-07	1.2166677e-08	7.3000062e-10	-31.15999450683591
1.515196e-07	1.5151961e-08	9.0911767e-10	-31.18999328613279
1.8854352e-07	1.8854355e-08	1.1312613e-09	-31.22000732421873
2.3437165e-07	2.3437169e-08	1.4062301e-09	-31.2500061035156
2.910717e-07	2.9107174e-08	1.7464304e-09	-31.28000488281248
3.6115884e-07	3.6115889e-08	2.1669535e-09	-31.31000366210935
4.4771531e-07	4.4771539e-08	2.6862925e-09	-31.34000244140623
5.5451454e-07	5.5451466e-08	3.3270879e-09	-31.3700012207031
6.8617226e-07	6.8617247e-08	4.1170347e-09	-31.39999999999998
8.4832936e-07	8.4832969e-08	5.0899782e-09	-31.42999877929685
1.0478736e-06	1.0478742e-07	6.2872454e-09	-31.45999755859373
1.2932076e-06	1.2932082e-07	7.7592501e-09	-31.4899963378906
1.5945726e-06	1.5945737e-07	9.5674437e-09	-31.51999511718748
1.9644413e-06	1.964443e-07	1.178666e-08	-31.54999389648435
2.4179888e-06	2.4179914e-07	1.450795e-08	-31.57999267578123
2.9739779e-06	2.9739817e-07	1.7843893e-08	-31.61000671386716
3.6542579e-06	3.6542639e-07	2.1925587e-08	-31.64000549316404
4.4862823e-06	4.4862912e-07	2.6917753e-08	-31.67000427246091
5.5030282e-06	5.5030421e-07	3.301826e-08	-31.70000305175779
6.744448e-06	6.7444688e-07	4.0466823e-08	-31.73000183105466
8.2589031e-06	8.2589338e-07	4.9553623e-08	-31.76000061035154
1.0104884e-05	1.010493e-06	6.0629603e-08	-31.78999938964841
1.2353073e-05	1.2353141e-06	7.4118887e-08	-31.81999816894529
1.5088814e-05	1.5088916e-06	9.0533561e-08	-31.84999694824216
1.8415069e-05	1.8415221e-06	1.1049143e-07	-31.87999572753904
2.2455952e-05	2.2456177e-06	1.3473721e-07	-31.90999450683591
2.736094e-05	2.7361277e-06	1.6416787e-07	-31.93999328613279
3.3313278e-05	3.3313777e-06	1.9988298e-07	-31.97000732421873
4.0523286e-05	4.0524023e-06	2.431446e-07	-32.0000061035156
4.9253638e-05	4.9254727e-06	2.9552905e-07	-32.03000488281248
5.9816346e-05	5.9817958e-06	3.5890875e-07	-32.06000366210935
7.2585688e-05	7.2588059e-06	4.3552984e-07	-32.09000244140623
8.8010223e-05	8.8013712e-06	5.2808446e-07	-32.1200012207031
0.00010662715	1.0663226e-05	6.3979678e-07	-32.14999999999998
0.00012907926	1.2908675e-05	7.7452518e-07	-32.17999877929685
0.00015613508	1.5614605e-05	9.3688317e-07	-32.20999755859373
0.00018871279	1.8872881e-05	1.1323829e-06	-32.2399963378906
0.00022790837	2.2793174e-05	1.3676051e-06	-32.26999511718748
0.00027502907	2.7506312e-05	1.6504001e-06	-32.29999389648435
0.00033163285	3.3168235e-05	1.9901252e-06	-32.32999267578123
0.00039961288	3.9968476e-05	2.3981536e-06	-32.36000671386716
0.00048110812	4.812123e-05	2.8873392e-06	-32.39000549316404
0.00057877478	5.7892561e-05	3.4736481e-06	-32.42000427246091
0.00069573056	6.9594847e-05	4.1758271e-06	-32.45000305175779
0.00083567563	8.3599007e-05	5.0161375e-06	-32.48000183105466
0.0010029982	0.00010034512	6.0209913e-06	-32.51000061035154
0.0012028975	0.00012035492	7.2217035e-06	-32.53999938964841
0.0014415289	0.00014424649	8.6553755e-06	-32.56999816894529
0.0017261722	0.00017275145	1.0365929e-05	-32.59999694824216
0.0020654299	0.00020673522	1.2405319e-05	-32.62999572753904
0.0024694579	0.00024722065	1.4834963e-05	-32.65999450683591
0.0029502336	0.00029541578	1.7727409e-05	-32.68999328613279
0.0035221865	0.00035277815	2.1170199e-05	-32.72000732421873
0.0042013465	0.00042093109	2.5260862e-05	-32.7500061035156
0.0050075054	0.00050188252	3.0120056e-05	-32.78000488281248
0.0059635853	0.00059796503	3.5887988e-05	-32.81000366210935
0.0070964643	0.00071192282	4.2729669e-05	-32.84000244140623
0.0084376093	0.00084698189	5.0839153e-05	-32.8700012207031
0.01002381	0.0010069314	6.0444494e-05	-32.89999999999998
0.011898	0.0011962188	7.1813505e-05	-32.92999877929685
0.01411019	0.0014200592	8.5260472e-05	-32.95999755859373
0.016718511	0.0016845637	0.00010115394	-32.9899963378906
0.019790372	0.001996886	0.00011992575	-33.01999511718748
0.023403741	0.0023653938	0.00014208166	-33.04999389648435
0.027648509	0.0027998653	0.00016821339	-33.07999267578123
0.032630708	0.0033119994	0.00019902996	-33.11000671386716
0.038463499	0.0039145933	0.00023530883	-33.14000549316404
0.045283858	0.0046234005	0.00027800864	-33.17000427246091
0.053244267	0.0054564746	0.00032823105	-33.20000305175779
0.062516324	0.006434801	0.0003872606	-33.23000183105466
0.073291644	0.0075827418	0.00045659396	-33.26000061035154
0.08578217	0.008928543	0.00053797371	-33.28999938964841
0.1002197	0.0105049	0.00063342729	-33.31999816894529
0.11685417	0.012349604	0.00074531179	-33.34999694824216
0.13595028	0.014506252	0.00087636558	-33.37999572753904
0.157782	0.017025048	0.0010297678	-33.40999450683591
0.18262416	0.019963661	0.0012092059	-33.43999328613279
0.21075594	0.023390079	0.0014190703	-33.47000732421873
0.24238576	0.027376378	0.0016640995	-33.5000061035156
0.27771664	0.032010246	0.0019501226	-33.53000488281248
0.31686506	0.037389379	0.0022837655	-33.56000366210935
0.35984412	0.043624211	0.0026726834	-33.59000244140623
0.40652972	0.050838973	0.0031257134	-33.6200012207031
0.45662522	0.059172623	0.0036530474	-33.64999999999998
0.50962883	0.068779573	0.0042664288	-33.67999877929685
0.56480843	0.079830043	0.0049793753	-33.70999755859373
0.62119234	0.09250994	0.0058074314	-33.7399963378906
0.67758322	0.10701993	0.0067684511	-33.76999511718748
0.73260427	0.1235736	0.0078829192	-33.79999389648435
0.78478289	0.14239426	0.0091743041	-33.82999267578123
0.83269507	0.16372161	0.010670287	-33.86000671386716
0.87501901	0.18775997	0.01240004	-33.89000549316404
0.91084033	0.2147339	0.014399283	-33.92000427246091
0.93968481	0.2448336	0.016707879	-33.95000305175779
0.96161938	0.27820945	0.019371139	-33.98000183105466
0.9772383	0.31495291	0.022440445	-34.01000061035154
0.98755205	0.35507429	0.025973929	-34.03999938964841
0.99379826	0.39847809	0.030037181	-34.06999816894529
0.99722397	0.44493747	0.034703981	-34.09999694824216
0.99890125	0.49406999	0.040057041	-34.12999572753904
0.99962234	0.54531807	0.046188705	-34.15999450683591
0.99988961	0.59793907	0.053201608	-34.18999328613279
0.99997324	0.65103668	0.061213609	-34.22000732421873
0.99999475	0.70347667	0.070341311	-34.2500061035156
0.99999917	0.75409901	0.080724649	-34.28000488281248
0.99999988	0.80168426	0.092510872	-34.31000366210935
1	0.84507877	0.10585766	-34.34000244140623
1	0.88330764	0.12093186	-34.3700012207031
1	0.91568601	0.13790727	-34.39999999999998
1	0.94190705	0.15696152	-34.42999877929685
1	0.96208555	0.17827164	-34.45999755859373
1	0.97673833	0.20200814	-34.4899963378906
1	0.98669904	0.2283275	-34.51999511718748
1	0.9929809	0.25736246	-34.54999389648435
1	0.99661922	0.28921062	-34.57999267578123
1	0.99853301	0.32393935	-34.61000671386716
1	0.99943417	0.36149812	-34.64000549316404
1	0.99980915	0.40180835	-34.67000427246091
1	0.99994475	0.44467729	-34.70000305175779
1	0.99998653	0.48979947	-34.73000183105466
1	0.99999732	0.53674453	-34.76000061035154
1	0.99999958	0.58495033	-34.78999938964841
1	0.99999994	0.63372505	-34.81999816894529
1	1	0.68226051	-34.84999694824216
1	1	0.72965986	-34.87999572753904
1	1	0.77498084	-34.90999450683591
1	1	0.81729364	-34.93999328613279
1	1	0.85576969	-34.97000732421873
1	1	0.88967925	-35.0000061035156
1	1	0.91857898	-35.03000488281248
1	1	0.94228274	-35.06000366210935
1	1	0.960904	-35.09000244140623
1	1	0.97483993	-35.1200012207031
1	1	0.98471612	-35.14999999999998
1	1	0.99129933	-35.17999877929685
1	1	0.99539602	-35.20999755859373
1	1	0.99775589	-35.2399963378906
1	1	0.99900264	-35.26999511718748
1	1	0.99960041	-35.29999389648435
1	1	0.99985749	-35.32999267578123
1	1	0.99995542	-35.36000671386716
1	1	0.99998796	-35.39000549316404
1	1	0.99999726	-35.42000427246091
1	1	0.99999946	-35.45000305175779
1	1	0.99999994	-35.48000183105466
1	1	1	-35.51000061035154
1	1	1	-35.53999938964841
1	1	1	-35.56999816894529
1	1	1	-35.59999694824216
1	1	1	-35.62999572753904
1	1	1	-35.65999450683591
1	1	1	-35.68999328613279
1	1	1	-35.72000732421873
1	1	1	-35.7500061035156
1	1	1	-35.78000488281248
1	1	1	-35.81000366210935
1	1	1	-35.84000244140623
1	1	1	-35.8700012207031
1	1	1	-35.89999999999998
1	1	1	-35.92999877929685
1	1	1	-35.95999755859373
1	1	1	-35.9899963378906
1	1	1	-36.01999511718748
1	1	1	-36.04999389648435
1	1	1	-36.07999267578123
1	1	1	-36.11000671386716
1	1	1	-36.14000549316404
1	1	1	-36.17000427246091
1	1	1	-36.20000305175779
1	1	1	-36.23000183105466
1	1	1	-36.26000061035154
1	1	1	-36.28999938964841
1	1	1	-36.31999816894529
1	1	1	-36.34999694824216
1	1	1	-36.37999572753904
1	1	1	-36.40999450683591
1	1	1	-36.43999328613279
1	1	1	-36.47000732421873
1	1	1	-36.5000061035156
1	1	1	-36.53000488281248
1	1	1	-36.56000366210935
1	1	1	-36.59000244140623
1	1	1	-36.6200012207031
1	1	1	-36.64999999999998
1	1	1	-36.67999877929685
1	1	1	-36.70999755859373
1	1	1	-36.7399963378906
1	1	1	-36.76999511718748
1	1	1	-36.79999389648435
1	1	1	-36.82999267578123
1	1	1	-36.86000671386716
1	1	1	-36.89000549316404
1	1	1	-36.92000427246091
1	1	1	-36.95000305175779
1	1	1	-36.98000183105466
1	1	1	-37.01000061035154
1	1	1	-37.03999938964841
1	1	1	-37.06999816894529
1	1	1	-37.09999694824216
1	1	1	-37.12999572753904
1	1	1	-37.15999450683591
1	1	1	-37.18999328613279
1	1	1	-37.22000732421873
1	1	1	-37.2500061035156
1	1	1	-37.28000488281248
1	1	1	-37.31000366210935
1	1	1	-37.34000244140623
1	1	1	-37.3700012207031
1	1	1	-37.39999999999998
1	1	1	-37.42999877929685
1	1	1	-37.45999755859373
1	1	1	-37.4899963378906
1	1	1	-37.51999511718748
1	1	1	-37.54999389648435
1	1	1	-37.57999267578123
1	1	1	-37.61000671386716
1	1	1	-37.64000549316404
1	1	1	-37.67000427246091
1	1	1	-37.70000305175779
1	1	1	-37.73000183105466
1	1	1	-37.76000061035154
1	1	1	-37.78999938964841
1	1	1	-37.81999816894529
1	1	1	-37.84999694824216
1	1	1	-37.87999572753904
1	1	1	-37.90999450683591
1	1	1	-37.93999328613279
1	1	1	-37.97000732421873
1	1	1	-38.0000061035156
1	1	1	-38.03000488281248
1	1	1	-38.06000366210935
1	1	1	-38.09000244140623
1	1	1	-38.1200012207031
1	1	1	-38.14999999999998
1	1	1	-38.17999877929685
1	1	1	-38.20999755859373
1	1	1	-38.2399963378906
1	1	1	-38.26999511718748
1	1	1	-38.29999389648435
1	1	1	-38.32999267578123
1	1	1	-38.36000671386716
1	1	1	-38.39000549316404
1	1	1	-38.42000427246091
1	1	1	-38.45000305175779
1	1	1	-38.48000183105466
1	1	1	-38.51000061035154
1	1	1	-38.53999938964841
1	1	1	-38.56999816894529
1	1	1	-38.59999694824216
1	1	1	-38.62999572753904
1	1	1	-38.65999450683591
1	1	1	-38.68999328613279
1	1	1	-38.72000732421873
1	1	1	-38.7500061035156
1	1	1	-38.78000488281248
1	1	1	-38.81000366210935
1	1	1	-38.84000244140623
1	1	1	-38.8700012207031
1	1	1	-38.89999999999998
1	1	1	-38.92999877929685
1	1	1	-38.95999755859373
1	1	1	-38.9899963378906
1	1	1	-39.01999511718748
1	1	1	-39.04999389648435
1	1	1	-39.07999267578123
1	1	1	-39.11000671386716
1	1	1	-39.14000549316404
1	1	1	-39.17000427246091
1	1	1	-39.20000305175779
1	1	1	-39.23000183105466
1	1	1	-39.26000061035154
1	1	1	-39.28999938964841
1	1	1	-39.31999816894529
1	1	1	-39.34999694824216
1	1	1	-39.37999572753904
1	1	1	-39.40999450683591
1	1	1	-39.43999328613279
1	1	1	-39.47000732421873
1	1	1	-39.5000061035156
1	1	1	-39.53000488281248
1	1	1	-39.56000366210935
1	1	1	-39.59000244140623
1	1	1	-39.6200012207031
1	1	1	-39.64999999999998
1	1	1	-39.67999877929685
1	1	1	-39.70999755859373
1	1	1	-39.7399963378906
1	1	1	-39.76999511718748
1	1	1	-39.79999389648435
1	1	1	-39.82999267578123
1	1	1	-39.86000671386716
1	1	1	-39.89000549316404
1	1	1	-39.92000427246091
1	1	1	-39.95000305175779
1	1	1	-39.98000183105466
1	1	1	-40.01000061035154
1	1	1	-40.03999938964841
1	1	1	-40.06999816894529
1	1	1	-40.09999694824216
1	1	1	-40.12999572753904
1	1	1	-40.15999450683591
1	1	1	-40.18999328613279
1	1	1	-40.22000732421873
1	1	1	-40.2500061035156
1	1	1	-40.28000488281248
1	1	1	-40.31000366210935
1	1	1	-40.34000244140623
1	1	1	-40.3700012207031
1	1	1	-40.39999999999998
1	1	1	-40.42999877929685
1	1	1	-40.45999755859373
1	1	1	-40.4899963378906
1	1	1	-40.51999511718748
1	1	1	-40.54999389648435
1	1	1	-40.57999267578123
1	1	1	-40.61000671386716
1	1	1	-40.64000549316404
1	1	1	-40.67000427246091
1	1	1	-40.70000305175779
1	1	1	-40.73000183105466
1	1	1	-40.76000061035154
1	1	1	-40.78999938964841
1	1	1	-40.81999816894529
1	1	1	-40.84999694824216
1	1	1	-40.87999572753904
1	1	1	-40.90999450683591
1	1	1	-40.93999328613279
1	1	1	-40.97000732421873
1	1	1	-41.0000061035156
1	1	1	-41.03000488281248
1	1	1	-41.06000366210935
1	1	1	-41.09000244140623
1	1	1	-41.1200012207031
1	1	1	-41.14999999999998
1	1	1	-41.17999877929685
1	1	1	-41.20999755859373
1	1	1	-41.2399963378906
1	1	1	-41.26999511718748
1	1	1	-41.29999389648435
1	1	1	-41.32999267578123
1	1	1	-41.36000671386716
1	1	1	-41.39000549316404
1	1	1	-41.42000427246091
1	1	1	-41.45000305175779
1	1	1	-41.48000183105466
1	1	1	-41.51000061035154
1	1	1	-41.53999938964841
1	1	1	-41.56999816894529
1	1	1	-41.59999694824216
1	1	1	-41.62999572753904
1	1	1	-41.65999450683591
1	1	1	-41.68999328613279
1	1	1	-41.72000732421873
1	1	1	-41.7500061035156
1	1	1	-41.78000488281248
1	1	1	-41.81000366210935
1	1	1	-41.84000244140623
1	1	1	-41.8700012207031
1	1	1	-41.89999999999998
1	1	1	-41.92999877929685
1	1	1	-41.95999755859373
1	1	1	-41.9899963378906
1	1	1	-42.01999511718748
1	1	1	-42.04999389648435
1	1	1	-42.07999267578123
1	1	1	-42.11000671386716
1	1	1	-42.14000549316404
1	1	1	-42.17000427246091
1	1	1	-42.20000305175779
1	1	1	-42.23000183105466
1	1	1	-42.26000061035154
1	1	1	-42.28999938964841
1	1	1	-42.31999816894529
1	1	1	-42.34999694824216
1	1	1	-42.37999572753904
1	1	1	-42.40999450683591
1	1	1	-42.43999328613279
1	1	1	-42.47000732421873
1	1	1	-42.5000061035156
1	1	1	-42.53000488281248
1	1	1	-42.56000366210935
1	1	1	-42.59000244140623
1	1	1	-42.6200012207031
1	1	1	-42.64999999999998
1	1	1	-42.67999877929685
1	1	1	-42.70999755859373
1	1	1	-42.7399963378906
1	1	1	-42.76999511718748
1	1	1	-42.79999389648435
1	1	1	-42.82999267578123
1	1	1	-42.86000671386716
1	1	1	-42.89000549316404
1	1	1	-42.92000427246091
1	1	1	-42.95000305175779
1	1	1	-42.98000183105466
1	1	1	-43.01000061035154
1	1	1	-43.03999938964841
1	1	1	-43.06999816894529
1	1	1	-43.09999694824216
1	1	1	-43.12999572753904
1	1	1	-43.15999450683591
1	1	1	-43.18999328613279
1	1	1	-43.22000732421873
1	1	1	-43.2500061035156
1	1	1	-43.28000488281248
1	1	1	-43.31000366210935
1	1	1	-43.34000244140623
1	1	1	-43.3700012207031
1	1	1	-43.39999999999998
1	1	1	-43.42999877929685
1	1	1	-43.45999755859373
1	1	1	-43.4899963378906
1	1	1	-43.51999511718748
1	1	1	-43.54999389648435
1	1	1	-43.57999267578123
1	1	1	-43.61000671386716
1	1	1	-43.64000549316404
1	1	1	-43.67000427246091
1	1	1	-43.70000305175779
1	1	1	-43.73000183105466
1	1	1	-43.76000061035154
1	1	1	-43.78999938964841
1	1	1	-43.81999816894529
1	1	1	-43.84999694824216
1	1	1	-43.87999572753904
1	1	1	-43.90999450683591
1	1	1	-43.93999328613279
1	1	1	-43.97000732421873
1	1	1	-44.0000061035156
1	1	1	-44.03000488281248
1	1	1	-44.06000366210935
1	1	1	-44.09000244140623
1	1	1	-44.1200012207031
1	1	1	-44.14999999999998
1	1	1	-44.17999877929685
1	1	1	-44.20999755859373
1	1	1	-44.2399963378906
1	1	1	-44.26999511718748
1	1	1	-44.29999389648435
1	1	1	-44.32999267578123
1	1	1	-44.36000671386716
1	1	1	-44.39000549316404
1	1	1	-44.42000427246091
1	1	1	-44.45000305175779
1	1	1	-44.48000183105466
1	1	1	-44.51000061035154
1	1	1	-44.53999938964841
1	1	1	-44.56999816894529
1	1	1	-44.59999694824216
1	1	1	-44.62999572753904
1	1	1	-44.65999450683591
1	1	1	-44.68999328613279
1	1	1	-44.72000732421873
1	1	1	-44.7500061035156
1	1	1	-44.78000488281248
1	1	1	-44.81000366210935
1	1	1	-44.84000244140623
1	1	1	-44.8700012207031
1	1	1	-44.89999999999998
1	1	1	-44.92999877929685
1	1	1	-44.95999755859373
1	1	1	-44.9899963378906
1	1	1	-45.01999511718748
1	1	1	-45.04999389648435
1	1	1	-45.07999267578123
1	1	1	-45.11000671386716
1	1	1	-45.14000549316404
1	1	1	-45.17000427246091
1	1	1	-45.20000305175779
1	1	1	-45.23000183105466
1	1	1	-45.26000061035154
1	1	1	-45.28999938964841
1	1	1	-45.31999816894529
1	1	1	-45.34999694824216
1	1	1	-45.37999572753904
1	1	1	-45.40999450683591
1	1	1	-45.43999328613279
1	1	1	-45.47000732421873
1	1	1	-45.5000061035156
1	1	1	-45.53000488281248
1	1	1	-45.56000366210935
1	1	1	-45.59000244140623
1	1	1	-45.6200012207031
1	1	1	-45.64999999999998
1	1	1	-45.67999877929685
1	1	1	-45.70999755859373
1	1	1	-45.7399963378906
1	1	1	-45.76999511718748
1	1	1	-45.79999389648435
1	1	1	-45.82999267578123
1	1	1	-45.86000671386716
1	1	1	-45.89000549316404
1	1	1	-45.92000427246091
1	1	1	-45.95000305175779
1	1	1	-45.98000183105466
1	1	1	-46.01000061035154
1	1	1	-46.03999938964841
1	1	1	-46.06999816894529
1	1	1	-46.09999694824216
1	1	1	-46.12999572753904
1	1	1	-46.15999450683591
1	1	1	-46.18999328613279
1	1	1	-46.22000732421873
1	1	1	-46.2500061035156
1	1	1	-46.28000488281248
1	1	1	-46.31000366210935
1	1	1	-46.34000244140623
1	1	1	-46.3700012207031
1	1	1	-46.39999999999998
1	1	1	-46.42999877929685
1	1	1	-46.45999755859373
1	1	1	-46.4899963378906
1	1	1	-46.51999511718748
1	1	1	-46.54999389648435
1	1	1	-46.57999267578123
1	1	1	-46.61000671386716
1	1	1	-46.64000549316404
1	1	1	-46.67000427246091
1	1	1	-46.70000305175779
1	1	1	-46.73000183105466
1	1	1	-46.76000061035154
1	1	1	-46.78999938964841
1	1	1	-46.81999816894529
1	1	1	-46.84999694824216
1	1	1	-46.87999572753904
1	1	1	-46.90999450683591
1	1	1	-46.93999328613279
1	1	1	-46.97000732421873
1	1	1	-47.0000061035156
1	1	1	-47.03000488281248
1	1	1	-47.06000366210935
1	1	1	-47.09000244140623
1	1	1	-47.1200012207031
1	1	1	-47.14999999999998
1	1	1	-47.17999877929685
1	1	1	-47.20999755859373
1	1	1	-47.2399963378906
1	1	1	-47.26999511718748
1	1	1	-47.29999389648435
1	1	1	-47.32999267578123
1	1	1	-47.36000671386716
1	1	1	-47.39000549316404
1	1	1	-47.42000427246091
1	1	1	-47.45000305175779
1	1	1	-47.48000183105466
1	1	1	-47.51000061035154
1	1	1	-47.53999938964841
1	1	1	-47.56999816894529
1	1	1	-47.59999694824216
1	1	1	-47.62999572753904
1	1	1	-47.65999450683591
1	1	1	-47.68999328613279
1	1	1	-47.72000732421873
1	1	1	-47.7500061035156
1	1	1	-47.78000488281248
1	1	1	-47.81000366210935
1	1	1	-47.84000244140623
1	1	1	-47.8700012207031
1	1	1	-47.89999999999998
1	1	1	-47.92999877929685
1	1	1	-47.95999755859373
1	1	1	-47.9899963378906
1	1	1	-48.01999511718748
1	1	1	-48.04999389648435
1	1	1	-48.07999267578123
1	1	1	-48.11000671386716
1	1	1	-48.14000549316404
1	1	1	-48.17000427246091
1	1	1	-48.20000305175779
1	1	1	-48.23000183105466
1	1	1	-48.26000061035154
1	1	1	-48.28999938964841
1	1	1	-48.31999816894529
1	1	1	-48.34999694824216
1	1	1	-48.37999572753904
1	1	1	-48.40999450683591
1	1	1	-48.43999328613279
1	1	1	-48.47000732421873
1	1	1	-48.5000061035156
1	1	1	-48.53000488281248
1	1	1	-48.56000366210935
1	1	1	-48.59000244140623
1	1	1	-48.6200012207031
1	1	1	-48.64999999999998
1	1	1	-48.67999877929685
1	1	1	-48.70999755859373
1	1	1	-48.7399963378906
1	1	1	-48.76999511718748
1	1	1	-48.79999389648435
1	1	1	-48.82999267578123
1	1	1	-48.86000671386716
1	1	1	-48.89000549316404
1	1	1	-48.92000427246091
1	1	1	-48.95000305175779
1	1	1	-48.98000183105466
1	1	1	-49.01000061035154
1	1	1	-49.03999938964841
1	1	1	-49.06999816894529
1	1	1	-49.09999694824216
1	1	1	-49.12999572753904
1	1	1	-49.15999450683591
1	1	1	-49.18999328613279
1	1	1	-49.22000732421873
1	1	1	-49.2500061035156
1	1	1	-49.28000488281248
1	1	1	-49.31000366210935
1	1	1	-49.34000244140623
1	1	1	-49.3700012207031
1	1	1	-49.39999999999998
1	1	1	-49.42999877929685
1	1	1	-49.45999755859373
1	1	1	-49.4899963378906
1	1	1	-49.51999511718748
1	1	1	-49.54999389648435
1	1	1	-49.57999267578123
1	1	1	-49.61000671386716
1	1	1	-49.64000549316404
1	1	1	-49.67000427246091
1	1	1	-49.70000305175779
1	1	1	-49.73000183105466
1	1	1	-49.76000061035154
1	1	1	-49.78999938964841
1	1	1	-49.81999816894529
1	1	1	-49.84999694824216
1	1	1	-49.87999572753904
1	1	1	-49.90999450683591
1	1	1	-49.93999328613279
1	1	1	-49.97000732421873
1	1	1	-50.0000061035156
1	1	1	-50.03000488281248
1	1	1	-50.06000366210935
1	1	1	-50.09000244140623
1	1	1	-50.1200012207031
1	1	1	-50.14999999999998
1	1	1	-50.17999877929685
1	1	1	-50.20999755859373
1	1	1	-50.2399963378906
1	1	1	-50.26999511718748
1	1	1	-50.29999389648435
1	1	1	-50.32999267578123
1	1	1	-50.36000671386716
1	1	1	-50.39000549316404
1	1	1	-50.42000427246091
1	1	1	-50.45000305175779
1	1	1	-50.48000183105466
1	1	1	-50.51000061035154
1	1	1	-50.53999938964841
1	1	1	-50.56999816894529
1	1	1	-50.59999694824216
1	1	1	-50.62999572753904
1	1	1	-50.65999450683591
1	1	1	-50.68999328613279
1	1	1	-50.72000732421873
1	1	1	-50.7500061035156
1	1	1	-50.78000488281248
1	1	1	-50.81000366210935
1	1	1	-50.84000244140623
1	1	1	-50.8700012207031
1	1	1	-50.89999999999998
1	1	1	-50.92999877929685
1	1	1	-50.95999755859373
1	1	1	-50.9899963378906
1	1	1	-51.01999511718748
1	1	1	-51.04999389648435
1	1	1	-51.07999267578123
1	1	1	-51.11000671386716
1	1	1	-51.14000549316404
1	1	1	-51.17000427246091
1	1	1	-51.20000305175779
1	1	1	-51.23000183105466
1	1	1	-51.26000061035154
1	1	1	-51.28999938964841
1	1	1	-51.31999816894529
1	1	1	-51.34999694824216
1	1	1	-51.37999572753904
1	1	1	-51.40999450683591
1	1	1	-51.43999328613279
1	1	1	-51.47000732421873
1	1	1	-51.5000061035156
1	1	1	-51.53000488281248
1	1	1	-51.56000366210935
1	1	1	-51.59000244140623
1	1	1	-51.6200012207031
1	1	1	-51.64999999999998
1	1	1	-51.67999877929685
1	1	1	-51.70999755859373
1	1	1	-51.7399963378906
1	1	1	-51.76999511718748
1	1	1	-51.79999389648435
1	1	1	-51.82999267578123
1	1	1	-51.86000671386716
1	1	1	-51.89000549316404
1	1	1	-51.92000427246091
1	1	1	-51.95000305175779
1	1	1	-51.98000183105466
1	1	1	-52.01000061035154
1	1	1	-52.03999938964841
1	1	1	-52.06999816894529
1	1	1	-52.09999694824216
1	1	1	-52.12999572753904
1	1	1	-52.15999450683591
1	1	1	-52.18999328613279
1	1	1	-52.22000732421873
1	1	1	-52.2500061035156
1	1	1	-52.28000488281248
1	1	1	-52.31000366210935
1	1	1	-52.34000244140623
1	1	1	-52.3700012207031
1	1	1	-52.39999999999998
1	1	1	-52.42999877929685
1	1	1	-52.45999755859373
1	1	1	-52.4899963378906
1	1	1	-52.51999511718748
1	1	1	-52.54999389648435
1	1	1	-52.57999267578123
1	1	1	-52.61000671386716
1	1	1	-52.64000549316404
1	1	1	-52.67000427246091
1	1	1	-52.70000305175779
1	1	1	-52.73000183105466
1	1	1	-52.76000061035154
1	1	1	-52.78999938964841
1	1	1	-52.81999816894529
1	1	1	-52.84999694824216
1	1	1	-52.87999572753904
1	1	1	-52.90999450683591
1	1	1	-52.93999328613279
1	1	1	-52.97000732421873
1	1	1	-53.0000061035156
1	1	1	-53.03000488281248
1	1	1	-53.06000366210935
1	1	1	-53.09000244140623
1	1	1	-53.1200012207031
